# Supplementary material for: Interplay Between Myocardial Bridging and Coronary Spasm in Patients With Myocardial Ischemia and Non‐Obstructive Coronary Arteries: Pathogenic and Prognostic Implications
Source: PubMed Central journal article supplement — J Am Heart Assoc. 2021 Jul 14;10(14):e020535. doi: 10.1161/JAHA.120.020535 (PMC8483499; doi:10.1161/jaha.120.020535), 2021-07-14
Supplement: JAH3-10-e020535-s001.pdf [file JAH3-10-e020535-s001.pdf]

# **Supplemental Material**

## **Data S1.**

### **Supplemental Methods**

#### *Invasive provocative test protocol*

ACh was administered in a stepwise manner into the left coronary artery (LCA) (20–200 µg) or into the right coronary artery (RCA) (20–50 µg) over a period of 3 min with a 2–3 min interval between injections. Coronary angiography was performed 1 min after each injection of these agents and/or when chest pain and/or ischaemic ECG shifts were observed. The decision of testing with provocative test LCA or RCA as first was left to the discretion of the physicians; both LCA and RCA were tested if the first test was negative. In patients with myocardial infarction and non-obstructive coronary arteries (MINOCA), the provocative test was performed during the same procedure of coronary angiography in the acute phase (within 48 hours from admission). In MINOCA patients taking vasoactive drugs, the provocation tests were performed after a washout period of at least 24 h for calcium channel blockers (CCBs) and nitrates. In stable patients taking vasoactive drugs (calcium-channel blockers and nitrates), the provocation tests were performed after a wash-out period for these drugs of at 48 h. A fasting period (including caffeine consumption) >12 h was requested in all stable patients. Finally, in patients with coronary stenosis of 50%, assessment of FFR, preceded by intracoronary nitroglycerine administration, was performed after the provocative vasoreactivity test. Angiographic responses during the provocative test were assessed in multiple orthogonal views in order to detect the most severe narrowing and/or analysed by using computerized quantitative coronary angiography (QCA-CMS, Version 6.0, Medis-Software, Leiden, The Netherlands). Occurrence of bradyarrhythmias (defined as bradycardia with heart rate < 50 bpm or second- or third-degree AV block lasting more than 3 s), atrial fibrillation and ventricular tachycardia (defined as three or more consecutive premature ventricular complexes) during the provocative test were also recorded.

### *Echocardiographic assessment*

All patients underwent a comprehensive echocardiographic evaluation during hospital admission using a standard ultrasound machine (Artida, Toshiba Medical System, Japan) and all images were digitally saved in raw data format to magneto optical discs for offline analysis performed by an experienced echocardiographer. Left ventricle (LV) and left atrial dimensions were obtained by M-mode and two-dimensional (2D) images whereas LV end-diastolic and end-systolic volumes and LVEF were calculated using the modified Simpson's biplane method.

**Table S1. Clinical, echocardiographic and angiographic features in the overall population and according to the response at invasive provocative test.**

| <b>Characteristics</b>                               | <b>Overall population<br/>(n= 310)</b> | <b>Positive Ach test<br/>(n= 183)</b> | <b>Negative Ach test<br/>(n = 127)</b> | <b>p value</b> |
|------------------------------------------------------|----------------------------------------|---------------------------------------|----------------------------------------|----------------|
| <b><i>Clinical characteristics</i></b>               |                                        |                                       |                                        |                |
| Age [median (IQR)]                                   | 60.6 ± 11.9                            | 59.4 ± 12.5                           | 61.4 ± 12.6                            | 0.151          |
| Male sex [n, (%)]                                    | 136 (43.9)                             | 78 (42.6)                             | 58 (45.7)                              | 0.595          |
| Hypertension [n, (%)]                                | 206 (66.5)                             | 118 (64.5)                            | 88 (69.3)                              | 0.378          |
| Diabetes [n, (%)]                                    | 61 (19.7)                              | 35 (19.1)                             | 26 (20.5)                              | 0.769          |
| Smoking habit [n, (%)]                               | 105 (33.9)                             | 60 (32.8)                             | 45 (35.4)                              | 0.628          |
| Dyslipidaemia [n, (%)]                               | 158 (51.0)                             | 86 (47.0)                             | 72 (56.7)                              | 0.093          |
| Obesity [n, (%)]                                     | 24 (7.7)                               | 16 (8.7)                              | 8 (6.3)                                | 0.428          |
| Family history of CAD [n, (%)]                       | 94 (30.3)                              | 52 (28.4)                             | 42 (33.1)                              | 0.380          |
| Clinical presentation [n, (%)]                       |                                        |                                       |                                        | 0.001          |
| MINOCA [n, (%)]                                      | 141 (45.5)                             | 98 (53.6)                             | 43 (33.9)                              |                |
| Stable angina [n, (%)]                               | 169 (54.5)                             | 85 (46.4)                             | 84 (66.1)                              |                |
| Previous CV history [n, (%)]                         | 27 (8.7)                               | 14 (7.7)                              | 13 (10.2)                              | 0.427          |
| <b><i>Laboratory data</i></b>                        |                                        |                                       |                                        |                |
| Hb (g/dL) [median (IQR)]                             | 13.2 [12.4; 14.2]                      | 13.2 [12.4; 14.2]                     | 13.1 [12.2; 14.1]                      | 0.452          |
| WBC (x10 <sup>3</sup> /L) [median (IQR)]             | 7.1 [6.1; 7.9]                         | 6.8 [5.9 7.9]                         | 7.2 [6.2; 8.1]                         | 0.152          |
| Serum creatinine on admission (mg/dL) [median (IQR)] | 0.83 [0.71; 0.96]                      | 0.83 [0.71; 0.94]                     | 0.85 [0.70; 1.01]                      | 0.387          |
| Troponin T peak (ng/mL) [median (IQR)]               | 0.01 [0.01; 0.19]                      | 0.01 [0.01; 0.17]                     | 0.01 [0.01; 0.28]                      | 0.394          |
| CRP (mg/L) [median (IQR)]                            | 0.05 [0.05; 0.5]                       | 0.05 [0.05; 0.50]                     | 0.05 [0.05; 2.50]                      | 0.092          |
| <b><i>Echocardiographic data</i></b>                 |                                        |                                       |                                        |                |
| EF on admission (%) [median (IQR)]                   | 61 [58; 64]                            | 61 [58; 64]                           | 61 [58; 63]                            | 0.435          |
| EF on admission < 50% [n, (%)]                       | 20 (6.5)                               | 11 (6.0)                              | 9 (7.1)                                | 0.705          |
| Diastolic dysfunction [n, (%)]                       | 191 (61.6)                             | 119 (65.0)                            | 72 (56.7)                              | 0.138          |
| <b><i>Angiographic data</i></b>                      |                                        |                                       |                                        |                |

|                                             |            |             |            |        |
|---------------------------------------------|------------|-------------|------------|--------|
| Myocardial bridging presence [n, (%)]       | 53 (17.1)  | 42 (23.0)   | 11 (8.7)   | 0.001  |
| Myocardial bridging localization            |            |             |            | 0.651  |
| LAD [n, (%)]                                | 46 (14.8)  | 36 (19.7)   | 10 (7.9)   |        |
| LCx [n, (%)]                                | 7 (2.2)    | 6 (3.3)     | 1 (0.8)    |        |
| RCA [n, (%)]                                | 0 (0.0)    | 0 (0.0)     | 0 (0.0)    |        |
| Myocardial bridging segment                 |            |             |            | 0.557  |
| proximal [n, (%)]                           | 4 (1.3)    | 4 (2.2)     | 0 (0.0)    |        |
| mid [n, (%)]                                | 41 (13.2)  | 32 (17.5)   | 9 (7.1)    |        |
| distal [n, (%)]                             | 8 (2.6)    | 6 (3.3)     | 2 (1.6)    |        |
| Myocardial bridging length, mm [mean±SD]    | 24.9 ± 7.3 | 26.3 ± 7.5  | 18.2 ± 4.0 | 0.001  |
| Presence of non-obstructive atherosclerosis | 150 (48.4) | 90 (49.2)   | 60 (47.2)  | 0.737  |
| <b>Complications</b>                        | 28 (0.1)   | 18 (0.1)    | 10 (0.1)   | 0.553  |
| AF / SVT [n, (%)]                           | 8 (2.6)    | 6 (3.3)     | 2 (1.6)    | 0.352  |
| Atrioventricular Block [n, (%)]             | 19 (6.1)   | 11 (6.0)    | 8 (6.3)    | 0.917  |
| VT/ VF [n, (%)]                             | 1 (0.3)    | 1 (0.01)    | 0 (0)      | 0.404  |
| <b>Therapy at discharge [n,(%)]</b>         |            |             |            |        |
| Statin                                      | 182 (58.7) | 115 (62.8)  | 67 (52.8)  | 0.076  |
| Calcium channel blockers                    | 206 (66.5) | 175 (95.6)  | 31 (24.4)  | 0.005  |
| β-blockers                                  | 93 (30)    | 0 (0)       | 93 (73.2)  | <0.001 |
| Nitrates                                    | 6 (1.9)    | 5 (2.7)     | 1 (0.8)    | 0.222  |
| Cardioaspirin                               | 143 (46.1) | 91 (49.7)   | 52 (40.9)  | 0.127  |
| ACEi/ARBs                                   | 216 (69.7) | (132 (72.1) | 84 (66.1)  | 0.259  |

IQR: InterQuartile Range; CAD: Coronary Artery Disease; ACS: Acute Coronary Syndrome; CV: Cardiovascular History; Hb: Haemoglobin; WBC: White Blood Count; CRP: C Reactive Protein; EF: Ejection Fraction; LAD: Left Anterior Descending; LCx: Left Circumflex; RCA: Right Coronary Artery; Ach: Acetylcholine; AF: Atrial Fibrillation; SVT; SupraVentricular Tachycardia; VT: Ventricular Tachycardia; VF: Ventricular Fibrillation; ACEi: angiotensin converting enzymes inhibitors; ARBs: Angiotensin receptor blockers

**Table S2. Predictors of ACh positive test in the overall population by univariate and multivariate logistic regression analysis.**

|                                 | Univariate analysis |         | Multivariable analysis |       |
|---------------------------------|---------------------|---------|------------------------|-------|
|                                 | OR (95% C.I.)       | p       | OR (95% C.I.)          | p     |
| Presence of myocardial bridging | 3.141 (1.55; 6.37)  | 0.002   | 2.569 (1.24; 5.33)     | 0.011 |
| MINOCA presentation             | 2.385 (1.49; 3.82)  | < 0.001 | 2.198 (1.35; 3.58)     | 0.002 |
| CRP                             | 1.058 (1.01; 1.11)  | 0.035   | 1.059 (1.01; 1.11)     | 0.028 |
| Dyslipidaemia                   | 1.597 (1.01; 2.52)  | 0.044   |                        |       |

MINOCA: myocardial infarction and non-obstructive coronary arteries; CRP: C-reactive protein; C.I.: Confidence Interval; OR: Odds Ratio.

**Table S3. Predictors of MINOCA in the overall population by univariate and multivariate logistic regression analysis.**

|                                 | Univariate analysis  |       | Multivariate analysis |       |
|---------------------------------|----------------------|-------|-----------------------|-------|
|                                 | OR (95% C.I.)        | p     | OR (95% C.I.)         | p     |
| Presence of myocardial bridging | 2.770 (1.490; 5.151) | 0.001 | 2.386 (1.267; 4.494)  | 0.007 |
| Positive ACh test               | 2.252 (1.410; 3.598) | 0.001 | 2.022 (1.254; 3.261)  | 0.004 |

MINOCA: myocardial infarction with no obstructive coronary atherosclerosis ACh: acetylcholine; C.I.: Confidence Interval; OR: Odds Ratio.

**Table S4. Predictors of MINOCA as clinical presentation in ACh positive test population by univariate and multivariate logistic regression analysis.**

|                                 | Univariate analysis  |       | Multivariable analysis |       |
|---------------------------------|----------------------|-------|------------------------|-------|
|                                 | OR (95% C.I.)        | p     | OR (95% C.I.)          | p     |
| Presence of myocardial bridging | 2.31 (1.09; 4.93)    | 0.030 | 2.908 (1.285; 6.578)   | 0.010 |
| Obesity                         | 0.92 (0.83; 0.98)    | 0.04  |                        |       |
| Diastolic Dysfunction           | 1.950 (1.060; 3.589) | 0.006 | 2.502 (1.302; 4.808)   | 0.005 |

C.I.: Confidence Interval; OR: Odds Ratio.



**Table S5. Predictors of MACE in the overall population by univariate and multivariable cox regression analysis.**

|                                 | Univariate analysis |        | Multivariable analysis |       |
|---------------------------------|---------------------|--------|------------------------|-------|
|                                 | HR (95% C.I.)       | p      | HR (95% C.I.)          | p     |
| Presence of myocardial bridging | 5.46 (2.48; 11.99)  | <0.001 | 3.98 (1.78-8.93)       | 0.001 |
| Positive ACh test               | 2.76 (1.03; 7.34)   | 0.043  |                        |       |
| MINOCA as clinical presentation | 5.48 (2.05-14.63)   | 0.001  | 4.23 (1.56-11.48)      | 0.005 |

MACE: Major Adverse Cardiovascular Event; MINOCA: myocardial infarction with non-obstructive coronary arteries; ACh: acetylcholine; C.I.: Confidence Interval; OR: Odds Ratio.

**Table S6. Therapy at discharge according to presence or absence of MB and according to ACh response.**

| <b>Therapy</b>         | <b>Overall population<br/>(n= 310)</b> | <b>Presence of Myocardial bridging and positive ACh test<br/>(n= 42)</b> | <b>Presence of Myocardial bridging and negative ACh test<br/>(n=11)</b> | <b>Absence of Myocardial Bridging and positive ACh test<br/>(n=141)</b> | <b>Absence of Myocardial bridging and negative ACh test<br/>(n = 116)</b> | <b>p value</b> |
|------------------------|----------------------------------------|--------------------------------------------------------------------------|-------------------------------------------------------------------------|-------------------------------------------------------------------------|---------------------------------------------------------------------------|----------------|
| Statin [n, (%)]        | 182 (58.7)                             | 26 (61.9)                                                                | 6 (54.5)                                                                | 81 (57.4)                                                               | 69 (59.5)                                                                 | 0.945          |
| CCB [n, (%)]           | 206 (66.5)                             | 40 (90.9)                                                                | 4 (36.3)                                                                | 136 (96.4)                                                              | 26 (22.4)                                                                 | <0.001         |
| β-blockers [n, (%)]    | 93 (30)                                | 2 (4.8)                                                                  | 6 (54.5)                                                                | 13 (9.2)                                                                | 72 (62.1)                                                                 | <0.001         |
| Nitrates [n, (%)]      | 6 (1.9)                                | 3 (7.1)                                                                  | 0 (0.0)                                                                 | 3 (2.1)                                                                 | 0 (0.0)                                                                   | 0.082          |
| Cardioaspirin [n, (%)] | 143 (46.1)                             | 21 (50.0)                                                                | 6 (54.5)                                                                | 66 (46.8)                                                               | 50 (43.1)                                                                 | 0.801          |
| ACEi/ARBs [n, (%)]     | 216 (69.7)                             | 34 (80.9)                                                                | 7 (63.6)                                                                | 99 (70.2)                                                               | 76 (65.5)                                                                 | 0.205          |

ACh: Acetylcholine; ACEi: angiotensin converting enzymes inhibitors; ARBs: Angiotensin receptor blockers; CCB: calcium-channel blockers.
